# Supplementary material for: The Effect of Herbage Availability, Pregnancy Stage and Rank on the Rate of Liveweight Loss during Fasting in Ewes
Source: MDPI journal article supplement (doi:10.3390/agriculture11060543), 2021-06-12
Supplement: s1 [file s1]

## Supplementary Materials

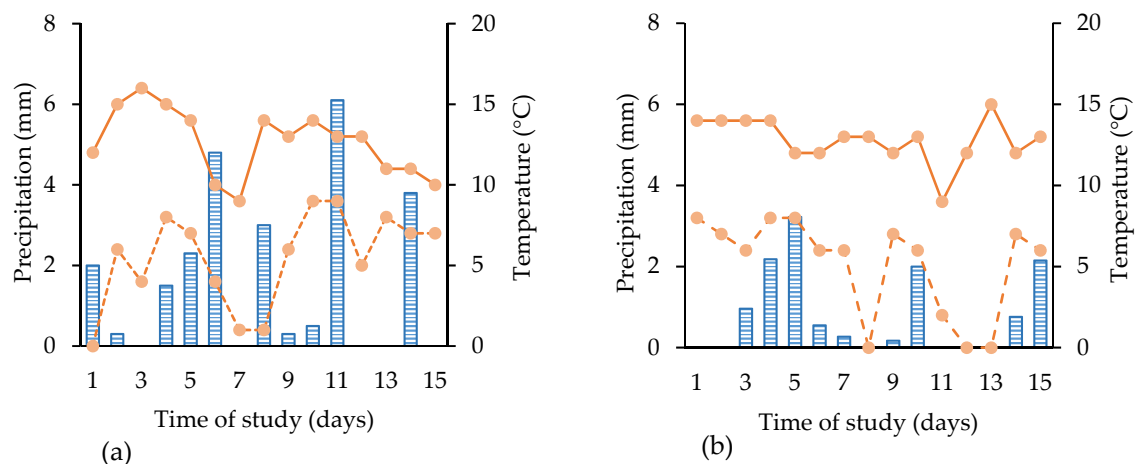

**Figure S1.** Average daily precipitation (stripped bars) and temperature (solid line: maximum, dashed: minimum) during the calibration stage over the study time for the ewes at approximately 100 days from the midpoint of a 17-day breeding period (a) and 130 days (b).

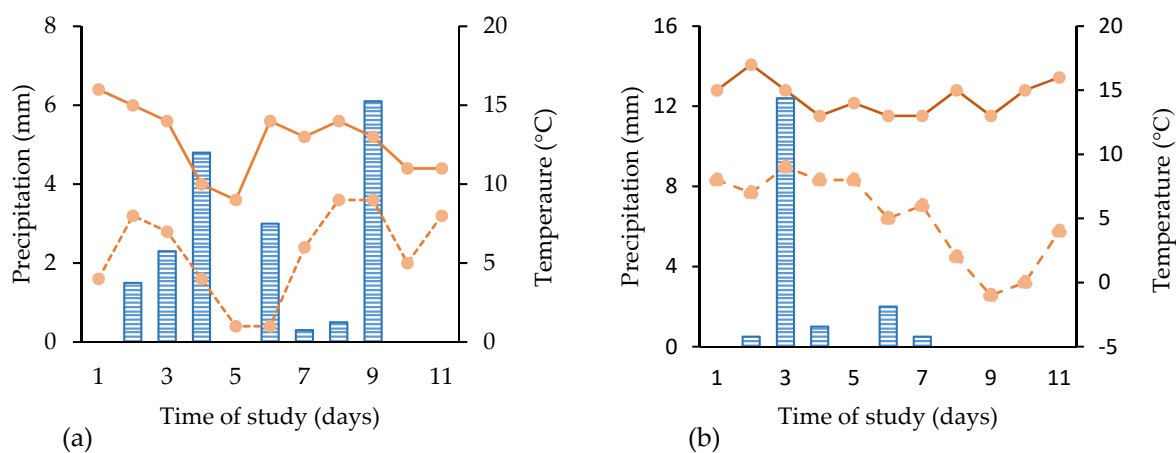

**Figure S2.** Average precipitation (stripped bars) and temperature (solid line: maximum, dashed: minimum) during the validation period of ewes at approximately 100 days of pregnancy from the midpoint of a 17-day breeding period at Keeble farm (a) and Tuapaka farm (b).

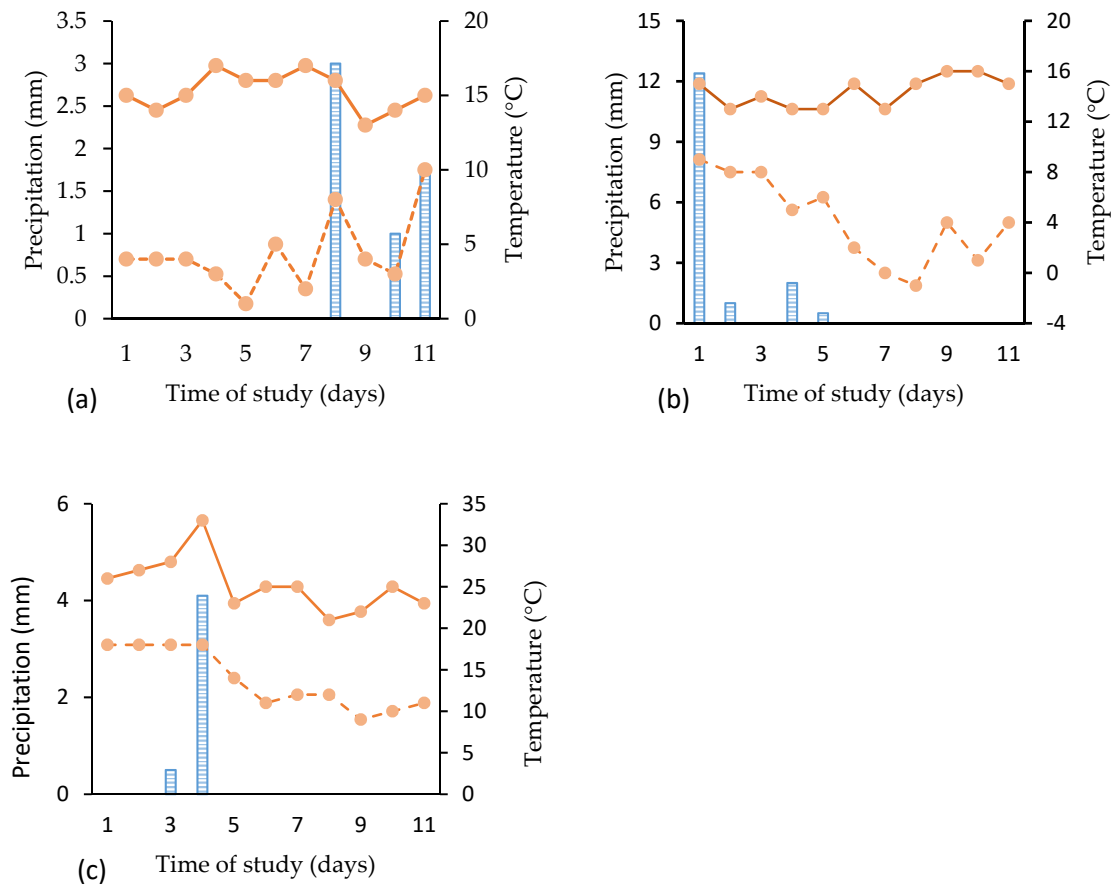

s

Figure S3. Average precipitation (stripped bars) and temperature (solid line: maximum, dashed: minimum) during the validation period of ewes at approximately 130 days of pregnancy from the midpoint of a 17-day breeding period at Keeble farm (a), Tuapaka farm (b) and Riverside farm (c).

**Table S1.** Estimated least squares mean herbage mass (kg DM/ha) and proportion of live/green matter (%) of Low and High herbage levels offered to ewes by stage of pregnancy (P100, P130) and weighing day (days on which weighing was conducted: 7, 12, 14) during the calibration study.

| †Pregnancy stage              | Herbage availability | Herbage mass (kg DM/ha)            |                           |                           |         | Proportion of live dry matter (%) |
|-------------------------------|----------------------|------------------------------------|---------------------------|---------------------------|---------|-----------------------------------|
|                               |                      | Weighing day <sup>1</sup>          | Weighing day <sup>2</sup> | Weighing day <sup>3</sup> | Overall |                                   |
| P100                          | Low                  | 1025.5                             | 986.8                     | 1037.5                    | 1016.6  | 80.8                              |
|                               | High                 | 1758.8                             | 1823.5                    | 1602.3                    | 1728.2  | 75.0                              |
| P130                          | Low                  | 1057.0                             | 1083.5                    | 1076.1                    | 1072.2  | 84.6                              |
|                               | High                 | 1891.4                             | 1839.7                    | 1737.2                    | 1822.8  | 91.4                              |
|                               |                      | SE                                 |                           |                           | 25.9    | 7.8                               |
| Model effects and comparisons |                      |                                    |                           |                           |         |                                   |
|                               |                      | Herbage availability (High vs Low) |                           |                           | ***     | ns                                |
|                               |                      | Stage of pregnancy (P100 vs P130)  |                           |                           | ns      | ns                                |

\*\*\* indicates  $p < 0.001$ , respectively. ns: indicates not significant ( $p > 0.05$ ). P100: approximately 100 days of pregnancy from the midpoint of a 17-day breeding period, P130: approximately 130 days. Herbage availability levels (Low herbage target range: 900–1100 kg DM/ha, High:  $\geq 1400$  kg DM/ha). †(Pregnancy stage indicates stage of study in terms of days not the physiological state per se).

**Table S2.** Herbage quality parameters (means with their standard errors in parenthesis) for grab samples of the Low and High herbage levels offered to ewes (Least square means) by stage of pregnancy (P100 and P130), during calibration.

| †Pregnancy stage                   | Herbage availability | Chemical composition |      |       |       |          |
|------------------------------------|----------------------|----------------------|------|-------|-------|----------|
|                                    |                      | DM %                 | CP % | NDF % | ADF % | ME MJ/kg |
| P100                               | Low                  | 19.6                 | 24.0 | 48.3  | 23.8  | 10.3     |
|                                    | High                 | 15.7                 | 24.4 | 39.1  | 19.7  | 10.5     |
| P130                               | Low                  | 18.8                 | 21.2 | 41.7  | 20.0  | 10.9     |
|                                    | High                 | 15.9                 | 24.1 | 38.7  | 18.2  | 11.7     |
|                                    | SE                   | 0.57                 | 0.81 | 1.7   | 1.1   | 0.24     |
| Model effect comparisons           |                      |                      |      |       |       |          |
| Herbage availability (High vs Low) |                      | *                    | ns   | *     | *     | *        |
| Stage of pregnancy (P100 vs P130)  |                      | ns                   | ns   | ns    | ns    | ns       |

DM: dry matter, neutral detergent fibre (NDF), ADF: acid detergent fibre (ADF), CP: crude protein, ME: metabolizable energy. Herbage availability levels (Low herbage target range: 900–1100 kg DM/ha, High:  $\geq 1400$  kg DM/ha). P100: approximately 100 days of pregnancy from the midpoint of a 17-day breeding period, P130: approximately 130 days. Herbage availability levels (Low herbage target range: 900–1100 kg DM/ha, High:  $\geq 1400$  kg DM/ha). \*, \*\*, \*\*\* indicate  $p < 0.05$ ,  $p < 0.01$  and  $p < 0.001$ , respectively. ns: indicates not significant ( $p > 0.05$ ). Means comparisons were based on Sidak's adjustment method. †(Pregnancy stage indicates stage of study in terms of days not the physiological state per se).

**Table S3.** Mean initial and final delayed weight and prediction parameters with standard errors in parentheses, coefficient of variation (CV) and adjusted  $R^2$  for ewe liveweight loss (kg) based on herbage availability level s (Low, High) offered to ewes at two stage of pregnancy (P100, P130) and pregnancy ranks (S: single-bearing, T: twin-bearing) during eight hours of fasting at calibration stage. Adjusted  $R^2$  is the goodness-of-fit of the model.

| Stage of Pregnancy | Pregnancy-rank | Herbage availability | Initial liveweight (kg) | Final liveweight (kg) | Intercept     | Time                       | Time <sup>2</sup>            | CV   | Adjusted R <sup>2</sup> |
|--------------------|----------------|----------------------|-------------------------|-----------------------|---------------|----------------------------|------------------------------|------|-------------------------|
| P100               | Single         | Low                  | 64.1(0.79)              | 60.8(0.81)            | -0.68(0.089)  | 0.65 <sup>ab</sup> (0.015) | -0.030 <sup>a</sup> (0.002)  | 0.23 | 0.72                    |
|                    |                | High                 | 69.7(0.85)              | 64.7(0.81)            | -0.69(0.089)  | 0.78 <sup>c</sup> (0.015)  | -0.031 <sup>a</sup> (0.002)  | 0.30 | 0.67                    |
|                    | Twin           | Low                  | 69.2(0.90)              | 66.1(0.81)            | -0.694(0.089) | 0.64 <sup>ab</sup> (0.016) | -0.030 <sup>a</sup> (0.002)  | 0.24 | 0.75                    |
|                    |                | High                 | 73.8(1.09)              | 69.0(1.81)            | -0.77(0.090)  | 0.77 <sup>c</sup> (0.015)  | -0.032 <sup>a</sup> (0.002)  | 0.31 | 0.67                    |
| P130               | Single         | Low                  | 69.9(0.88)              | 67.1(0.87)            | -0.73(0.090)  | 0.59 <sup>a</sup> (0.015)  | -0.030 <sup>a</sup> (0.002)  | 0.32 | 0.72                    |
|                    |                | High                 | 72.5(0.91)              | 69.0(0.86)            | -0.71(0.089)  | 0.70 <sup>b</sup> (0.015)  | -0.030 <sup>a</sup> (0.002)  | 0.31 | 0.72                    |
|                    | Twin           | Low                  | 72.9(0.69)              | 70.0(0.65)            | -0.70(0.089)  | 0.61 <sup>a</sup> (0.015)  | -0.030 <sup>a</sup> (0.002)  | 0.29 | 0.63                    |
|                    |                | High                 | 76.4(0.87)              | 72.9(0.82)            | -0.65(0.090)  | 0.70 <sup>b</sup> (0.016)  | -0.031 <sup>a</sup> (0.002)  | 0.28 | 0.77                    |
| Combined (overall) |                |                      |                         |                       |               |                            |                              |      |                         |
| (ST)P100           |                | Low                  | 66.4(0.64)              | 63.2(0.62)            | 0.11(0.064)   | 0.64 <sup>ab</sup> (0.027) | -0.025 <sup>a</sup> (0.003)  | 0.23 | 0.73                    |
| (ST)P100           |                | High                 | 71.7(0.71)              | 66.8(0.69)            | -0.06(0.068)  | 0.81 <sup>d</sup> (0.030)  | -0.037 <sup>a</sup> (0.004)  | 0.30 | 0.81                    |
| (ST)P130           |                | Low                  | 71.4(0.57)              | 68.5(0.55)            | 0.06(0.055)   | 0.56 <sup>a</sup> (0.023)  | -0.027 <sup>a</sup> (0.002)  | 0.30 | 0.68                    |
| (ST)P130           |                | High                 | 74.5(0.65)              | 70.9(0.62)            | -0.04(0.060)  | 0.71 <sup>b</sup> (0.019)  | -0.039 <sup>ab</sup> (0.002) | 0.29 | 0.75                    |

<sup>abcd</sup>: different superscripts denote significant difference at  $p < 0.05$  in a column per physiological state. Herbage availability (Low target range herbage: 900–1100 kg DM/ha, High:  $\geq 1400$  kg DM/ha;). Pregnancy-rank (S: single-bearing, T: twin-bearing; ST: Combination of single- and twin-bearing ewes). Stages of pregnancy (P100: 100 days of pregnancy from the midpoint of a 17-day breeding period, P130: 130 days). The best model has the highest  $R^2$  and the lowest RMSE. Time and Time<sup>2</sup> are the linear and quadratic effects of fasting time. Model for liveweight loss prediction (E.g. liveweight loss of ewes at 100 days of pregnancy offered the low herbage level =  $-0.68 + 0.65\text{Time} - 0.03\text{Time}^2$ ,  $R^2 = 0.72$ )

**Table S4.** Estimated herbage mass (least squares means) and proportion of live and dead matter of Low and High herbage levels (kg DM/ha) offered to ewe by stage of pregnancy and day of ewe weighing at different farms (Keeble, Tuapaka, Riverside) during the validation of liveweight correction models.

| †Pregnancy stage                   | Farm      | Herbage availability    | Herbage mass (kg DM/ha) |                    | Overall      | Live matter (%) |
|------------------------------------|-----------|-------------------------|-------------------------|--------------------|--------------|-----------------|
|                                    |           |                         | *Weighing day one       | **Weighing day two |              |                 |
| <i>P100</i>                        | Keeble    | Low                     | 1017.5                  | 930                | 973.75       | 72.3            |
|                                    |           | High                    | 2141                    | 2026.9             | 2083.95      | 96.2            |
|                                    | Tuapaka   | Low                     | 986.8                   | 967.9              | 977.35       | 82.7            |
|                                    |           | High                    | 1923.5                  | 1711.9             | 1817.7       | 88.3            |
|                                    |           | <i>SEM</i> <sup>1</sup> |                         |                    | 94.4         |                 |
| <i>P130</i>                        | Keeble    | Low                     | 1105.9                  | 990                | 1047.95      | 84.6            |
|                                    |           | High                    | 1892.9                  | 1815.1             | 1854         | 91.4            |
|                                    | Tuapaka   | Low                     | 1040                    | 1030.4             | 1035.2       | 75.4            |
|                                    |           | High                    | 2169.5                  | 1727.3             | 1948.4       | 84.9            |
|                                    | Riverside | Low                     | 1081.6                  | 990                | 1035.8       | 78.8            |
|                                    |           | High                    | 1681.5                  | 1564.1             | 1622.8       | 81.4            |
|                                    |           | <i>SEM</i> <sup>2</sup> |                         |                    | (59.4, 72.3) |                 |
| Model effect comparisons           |           |                         |                         |                    |              |                 |
| Herbage availability (High vs Low) |           |                         |                         |                    | **           | *               |
| Pregnancy stage (P100 vs P130)     |           |                         |                         |                    | ns           | ns              |
| Farm                               |           |                         |                         |                    | *            | ns              |
| Farm x Herbage availability        |           |                         |                         |                    |              |                 |
| P100                               |           |                         |                         |                    | **           | ns              |
| P130                               |           |                         |                         |                    | ns           | ns              |

Herbage availability (Low herbage target range: 900–1100 kg DM/ha, High:  $\geq 1400$ ). Stage of pregnancy (P100: 100 days of pregnancy from the midpoint of a 17-day breeding period, P130: 130 days). \*,\*\* indicate significant at  $p < 0.05$ ,  $p < 0.01$  and  $p < 0.001$ , respectively. ns indicates not significant. SEM (1: two-way herbage x farm; 2: no interaction two factors (herbage availability = 59.4, farm = 72.3)). †(Pregnancy stage indicates stage of study in terms of days not the physiological state per se).

**Table S5.** Herbage quality parameters for hand-plucked samples of the Low and High herbage levels by farm (Keeble, Tuapaka and Riverside), and stage of pregnancy (P100, P130) offered to ewes pre-fasting during validation.

| †Pregnancy stage                   | Farm   | Herbage availability | DM % | CP % | NDF % | ADF % | ME % |      |
|------------------------------------|--------|----------------------|------|------|-------|-------|------|------|
| P100                               | Keeble | Low                  | 19.8 | 20.0 | 51.8  | 30.6  | 9.4  |      |
|                                    |        | High                 | 16.0 | 24.4 | 37.6  | 20.6  | 11.0 |      |
|                                    | High   | 13.4                 | 27.5 | 38.9 | 20.0  | 12.2  |      |      |
|                                    | SEM    | 0.68                 | 1.82 | 2.20 | 1.60  | 0.41  |      |      |
|                                    | P130   | Keeble               | Low  | 20.9 | 24.0  | 39.5  | 19.9 | 11.5 |
| High                               |        |                      | 14.4 | 29.9 | 41.8  | 20.2  | 11.7 |      |
| High                               |        | 12.7                 | 29.6 | 37.8 | 18.2  | 12.0  |      |      |
| High                               |        | 18.8                 | 18.9 | 48.4 | 27.4  | 9.7   |      |      |
| SEM                                |        | 0.80                 | 1.70 | 2.16 | 1.56  | 0.33  |      |      |
| Model effects and comparisons      |        |                      |      |      |       |       |      |      |
| Herbage availability (High vs Low) |        |                      | **   | ns   | *     | *     | ns   |      |
| Pregnancy stage (P100 vs P130)     |        |                      | **   | ns   | ns    | ns    | ns   |      |
| Farm                               |        |                      | *    | ns   | *     | *     | ns   |      |
| Farm x Herbage availability        |        |                      | *    | ns   | *     | *     | ns   |      |

DM: Dry matter, CP: Crude protein, NDF: Neutral detergent fibre, ADF: acid detergent fibre, ME: metabolizable energy. Herbage availability (Low target range herbage: 900–1100 kg DM/ha, High (H):  $\geq 1400$ ). P100: approximately 100 days of pregnancy from the midpoint of a 17-day breeding period, P130: approximately 130 days. Herbage availability levels (Low herbage target range: 900–1100 kg DM/ha, High:  $\geq 1400$  kg DM/ha). \*, \*\* indicate  $p < 0.05$ ,  $p < 0.01$ , respectively. †(Pregnancy stage indicates stage of study in terms of days not the physiological state per se).

**Table S6.** Mean initial (without delay) and final weight and prediction parameters with standard errors in parentheses, of P100 ewe liveweight loss (kg) during a six-hour fasting periods, by herbage availability level (Low, High), farm (Keeble, Riverside) and pregnancy-rank (single, twin-bearing). CV is the coefficient of variation and adjusted  $R^2$  is a measure of goodness of fitness of the model. All models were significant at  $p < 0.01$ .

| Farm       | TRT  | PD     | Liveweight (kg) |            | Predictor                 |                             |                               | CV   | Adjusted $R^2$ |
|------------|------|--------|-----------------|------------|---------------------------|-----------------------------|-------------------------------|------|----------------|
|            |      |        | Initial         | Final      | Intercept                 | Time                        | Time2                         |      |                |
| *Riverside | Low  | Single | 64.8(0.65)      | 62.1(0.61) | −1.1 <sup>ab</sup> (0.2)  | 0.86 <sup>abc</sup> (0.063) | −0.066 <sup>ab</sup> (0.009)  | 0.33 | 0.73           |
|            |      | Twin   | 70.0(0.76)      | 67.3(0.75) | −1.1 <sup>ab</sup> (0.22) | 0.84 <sup>abc</sup> (0.068) | −0.064 <sup>ab</sup> (0.010)  | 0.29 | 0.77           |
|            | High | Single | 69.7(0.69)      | 66.3(0.69) | −1.1 <sup>ab</sup> (0.21) | 0.98 <sup>bc</sup> (0.063)  | −0.067 <sup>ab</sup> (0.010)  | 0.34 | 0.72           |
|            |      | Twin   | 73.9(0.88)      | 70.6(0.87) | −0.9 <sup>ab</sup> (0.21) | 0.90 <sup>b</sup> (0.063)   | −0.055 <sup>b</sup> (0.010)   | 0.37 | 0.74           |
| †Keeble    | Low  | Single | 65.4(0.92)      | 63.6(0.88) | −1.0 <sup>ab</sup> (0.27) | 0.67 <sup>ab</sup> (0.083)  | −0.060 <sup>ab</sup> (0.013)  | 0.59 | 0.46           |
|            |      | Twin   | 68.6(1.02)      | 66.8(1.00) | −1.1 <sup>ab</sup> (0.27) | 0.69 <sup>ab</sup> (0.082)  | −0.060 <sup>ab</sup> (0.013)  | 0.57 | 0.51           |
|            | High | Single | 70.9(1.08)      | 67.3(1.06) | −1.6 <sup>a</sup> (0.27)  | 1.18 <sup>c</sup> (0.084)   | −0.093 <sup>a</sup> (0.013)   | 0.36 | 0.72           |
|            |      | Twin   | 72.4(0.87)      | 69.1(0.86) | −1.5 <sup>a</sup> (0.27)  | 1.12 <sup>c</sup> (0.084)   | −0.090 <sup>a</sup> (0.013)   | 0.35 | 0.70           |
| †Tuapaka   | Low  | Single | 62.1(0.72)      | 59.1(0.67) | −0.3 <sup>b</sup> (0.26)  | 0.58 <sup>a</sup> (0.08)    | −0.022 <sup>c</sup> (0.012)   | 0.48 | 0.58           |
|            |      | Twin   | 67.6(0.63)      | 64.6(0.64) | −0.5 <sup>ab</sup> (0.26) | 0.66 <sup>ab</sup> (0.08)   | −0.034 <sup>bc</sup> (0.012)  | 0.43 | 0.61           |
|            | High | Single | 67.3(1.09)      | 63.2(1.06) | −1.0 <sup>ab</sup> (0.27) | 1.01 <sup>bc</sup> (0.081)  | −0.068 <sup>abc</sup> (0.012) | 0.33 | 0.72           |
|            |      | Twin   | 69.1(0.83)      | 65.2(0.78) | −1.0 <sup>ab</sup> (0.26) | 0.99 <sup>bc</sup> (0.08)   | −0.066 <sup>abc</sup> (0.012) | 0.33 | 0.72           |

Liveweight (Initial: liveweight without delay, Final: Liveweight after eight hours of fasting). Asterisks \*,† attached to farm name indicate the study stage dataset used for the analysis (\*: calibration dataset, †: validation dataset). <sup>abc</sup>: different superscripts denote significant difference at  $p < 0.05$  within each column of predictors. Availability level (Low herbage target range: 900–1100 kg DM/ha, High:  $\geq 1400$ ). Model goodness of fit: the higher  $R^2$  the better. All contrasts based on Sidak's multiple-comparisons tests.

**Table S7.** Mean initial (without delay) and final weight and prediction parameters with standard errors in parentheses, of P130 ewe liveweight loss (kg) during a six-hour fasting periods, by herbage availability (Low, High), farm (Keeble, Riverside) and pregnancy-rank (PR: single, twin-bearing). CV is the coefficient of variation and adjusted R<sup>2</sup> is a measure of goodness of fitness of the model. All models were significant at  $p < 0.01$ .

| Farm       | TRT  | PR     | Liveweight (kg) |            | Predictor                |                            |                             | CV   | Adjusted R <sup>2</sup> |
|------------|------|--------|-----------------|------------|--------------------------|----------------------------|-----------------------------|------|-------------------------|
|            |      |        | Initial         | Final      | Intercept                | Time                       | Time <sup>2</sup>           |      |                         |
| *Keeble    | Low  | Single | 69.9(0.88)      | 67.6(0.86) | -0.2 <sup>a</sup> (0.21) | 0.50 <sup>a</sup> (0.068)  | 0.026 <sup>a</sup> (0.011)  | 0.38 | 0.67                    |
|            |      | Twin   | 72.9(0.69)      | 70.5(0.66) | -0.3 <sup>a</sup> (0.21) | 0.53 <sup>a</sup> (0.068)  | 0.032 <sup>ab</sup> (0.011) | 0.37 | 0.67                    |
|            | High | Single | 72.5(0.91)      | 69.6(0.88) | 0.1 <sup>a</sup> (0.21)  | 0.66 <sup>ab</sup> (0.067) | 0.014 <sup>a</sup> (0.01)   | 0.37 | 0.70                    |
|            |      | Twin   | 76.4(0.87)      | 73.4(0.83) | -0.6 <sup>a</sup> (0.2)  | 0.82 <sup>bc</sup> (0.066) | 0.052 <sup>ab</sup> (0.01)  | 0.35 | 0.70                    |
| †Keeble    | Low  | Single | 69.8(0.93)      | 68.0(0.91) | -0.6 <sup>a</sup> (0.19) | 0.66 <sup>ab</sup> (0.061) | 0.047 <sup>ab</sup> (0.009) | 0.54 | 0.60                    |
|            |      | Twin   | 75.8(1.11)      | 74.1(1.10) | -0.7 <sup>a</sup> (0.19) | 0.70 <sup>ab</sup> (0.061) | 0.052 <sup>ab</sup> (0.009) | 0.57 | 0.47                    |
|            | High | Single | 72.2(0.96)      | 68.8(0.88) | -0.8 <sup>a</sup> (0.2)  | 0.78 <sup>bc</sup> (0.063) | 0.06 <sup>ab</sup> (0.010)  | 0.41 | 0.65                    |
|            |      | Twin   | 77.7(1.01)      | 75.4(1.00) | -0.8 <sup>a</sup> (0.2)  | 0.81 <sup>bc</sup> (0.064) | 0.065 <sup>ab</sup> (0.01)  | 0.39 | 0.64                    |
| †Riverside | Low  | Single | 69.1(0.89)      | 66.7(0.84) | -0.4 <sup>a</sup> (0.22) | 0.63 <sup>ab</sup> (0.07)  | 0.039 <sup>ab</sup> (0.011) | 0.45 | 0.65                    |
|            |      | Twin   | 74.7(0.87)      | 72.4(0.85) | -0.7 <sup>a</sup> (0.22) | 0.74 <sup>b</sup> (0.071)  | 0.056 <sup>ab</sup> (0.011) | 0.41 | 0.68                    |
|            | High | Single | 73.2(0.88)      | 70.3(0.87) | -0.8 <sup>a</sup> (0.23) | 0.97 <sup>c</sup> (0.075)  | 0.084 <sup>b</sup> (0.013)  | 0.32 | 0.78                    |
|            |      | Twin   | 78.1(1.15)      | 75.4(1.13) | -0.8 <sup>a</sup> (0.23) | 0.86 <sup>bc</sup> (0.074) | 0.069 <sup>ab</sup> (0.012) | 0.32 | 0.77                    |
| †Tuapaka   | Low  | Single | 70.0(1.03)      | 67.2(1.00) | -0.5 <sup>a</sup> (0.21) | 0.64 <sup>ab</sup> (0.068) | 0.043 <sup>ab</sup> (0.011) | 0.35 | 0.71                    |
|            |      | Twin   | 75.5(0.83)      | 72.7(0.81) | -0.5 <sup>a</sup> (0.22) | 0.61 <sup>ab</sup> (0.072) | 0.04 <sup>ab</sup> (0.012)  | 0.35 | 0.70                    |
|            | High | Single | 73.2(0.97)      | 69.5(0.94) | -0.5 <sup>a</sup> (0.22) | 0.67 <sup>ab</sup> (0.07)  | 0.04 <sup>ab</sup> (0.011)  | 0.33 | 0.78                    |
|            |      | Twin   | 76.7(0.87)      | 73.3(0.83) | -0.3 <sup>a</sup> (0.21) | 0.58 <sup>ab</sup> (0.069) | 0.027 <sup>ab</sup> (0.011) | 0.36 | 0.74                    |

Liveweight (Initial: liveweight without delay, Final: Liveweight after eight hours of fasting). Asterisks \*,† attached to farm name indicate the study-stage dataset used for the analysis (\*: calibration dataset, †: validation dataset). <sup>abc</sup>: different superscripts denote significant difference at  $p < 0.05$  within each column of predictors. Availability level (Low herbage target range: 900–1100 kg DM/ha, High: ≥1400). Model goodness of fit: the higher R<sup>2</sup> the better. All contrasts based on Sidak's multiple-comparisons tests.

**Table S8.** Measures of goodness of fit and accuracy (Bias, RMSE, RPE, RPD, RPIQ,  $r^2$ , CCC) of liveweight (without delay) prediction models (None: no model applied, separate: a separate/specific model applied, combined: pooled model where results were not significantly different and mistaken: model not developed for that availability level was applied) of ewes offered the Low, and High levels by pregnancy-rank (PR: single, twin-bearing ) at 100 days of pregnancy (from the midpoint of a 17-day breeding period) and during six hours of fasting tested on independent datasets (validation dataset) from Keeble farm and Riverside farm collected in 2020. The range of values reflects the results of 30 random iterations of the models. Liveweight means with their standard errors in parenthesis.

| Farm    | Herbage availability | PR     | Model    | Liveweight (kg) |              |                 | Bias  | RMSE | RPE% | RPD  | RPIQ  | $r^2$ % |
|---------|----------------------|--------|----------|-----------------|--------------|-----------------|-------|------|------|------|-------|---------|
|         |                      |        |          | Actual Initial  | Actual Final | Predicted Final |       |      |      |      |       |         |
| Keeble  | Low                  | Single | None     |                 |              |                 | -1.47 | 1.74 | 2.67 | 3.69 | 5.75  | 98.3    |
|         |                      |        | Separate |                 |              | 65.2(1.53)      | 0.45  | 1.10 | 1.68 | 5.83 | 9.09  | 98.3    |
|         |                      |        | Combined | 65.4(1.47)      | 63.6(1.45)   | 65.0(1.53)      | 0.32  | 1.18 | 1.81 | 5.44 | 8.47  | 98.3    |
|         |                      |        | Mistaken |                 |              | 66.1(1.53)      | 0.94  | 1.51 | 2.30 | 4.28 | 6.67  | 98.3    |
|         |                      | Twin   | None     |                 |              |                 | -1.28 | 1.56 | 2.27 | 4.55 | 7.50  | 98.9    |
|         |                      |        | Separate |                 |              | 69.6(2.1)       | 0.56  | 0.95 | 1.38 | 7.56 | 12.32 | 98.9    |
|         |                      |        | Combined | 68.6(1.87)      | 66.8(2.0)    | 69.5(2.1)       | 0.51  | 0.92 | 1.34 | 7.81 | 12.72 | 98.9    |
|         |                      |        | Mistaken |                 |              | 70.6(2.1)       | 1.13  | 1.44 | 2.10 | 4.99 | 8.13  | 98.9    |
|         | High                 | Single | None     |                 |              |                 | -2.62 | 2.97 | 4.19 | 2.57 | 2.79  | 97.8    |
|         |                      |        | Separate |                 |              | 71.0(1.06)      | -0.19 | 1.10 | 1.55 | 6.94 | 7.55  | 97.8    |
|         |                      |        | Combined | 70.9(1.01)      | 67.3(0.93)   | 71.1(1.06)      | -0.14 | 1.11 | 1.55 | 6.94 | 7.55  | 97.8    |
|         |                      |        | Mistaken |                 |              | 70.0(1.06)      | -0.78 | 1.34 | 1.89 | 5.70 | 6.19  | 97.8    |
|         |                      | Twin   | None     |                 |              |                 | -2.67 | 2.76 | 3.81 | 2.19 | 3.53  | 97.6    |
|         |                      |        | Separate |                 |              | 72.5(2.84)      | -0.39 | 1.08 | 1.49 | 5.6  | 8.94  | 97.6    |
|         |                      |        | Combined | 72.4(2.76)      | 69.1(2.82)   | 72.9(2.84)      | -0.19 | 1.02 | 1.41 | 5.93 | 9.46  | 97.6    |
|         |                      |        | Mistaken |                 |              | 71.7(2.84)      | -0.83 | 1.22 | 1.68 | 4.96 | 7.91  | 97.6    |
| Tuapaka | Low                  | Single | None     |                 |              |                 | -1.92 | 2.25 | 3.60 | 2.26 | 2.71  | 96.4    |
|         |                      |        | Separate |                 |              | 62.0(1.67)      | 0.08  | 1.00 | 1.57 | 5.10 | 6.11  | 96.4    |
|         |                      |        | Combined | 62.1(1.54)      | 59.1(1.60)   | 61.8(1.67)      | -0.05 | 1.00 | 1.60 | 5.11 | 6.12  | 96.4    |
|         |                      |        | Mistaken |                 |              | 63.0(1.67)      | 0.60  | 1.20 | 1.90 | 4.24 | 5.08  | 96.4    |
|         |                      | Twin   | None     |                 |              |                 | -1.97 | 2.50 | 3.72 | 1.97 | 2.48  | 91.7    |
|         |                      |        | Separate |                 |              | 67.7(2.7)       | -0.05 | 1.38 | 2.01 | 3.56 | 4.52  | 91.7    |
|         |                      |        | Combined | 67.6(2.61)      | 64.6(2.70)   | 67.6(2.7)       | -0.1  | 1.39 | 2.03 | 3.55 | 4.52  | 91.7    |
|         |                      |        | Mistaken |                 |              | 68.8(2.7)       | 0.55  | 1.51 | 2.21 | 3.26 | 4.13  | 91.7    |
|         | High                 | Single | None     |                 |              |                 | -2.83 | 3.33 | 4.94 | 2.28 | 2.9   | 96.1    |
|         |                      |        | Separate |                 |              | 66.8(1.04)      | -0.37 | 1.56 | 2.26 | 4.86 | 6.18  | 96.1    |
|         |                      |        | Combined | 67.3(1.01)      | 63.2(1.04)   | 67.0(1.04)      | -0.32 | 1.55 | 2.31 | 4.89 | 6.22  | 96.1    |
|         |                      |        | Mistaken |                 |              | 65.8(1.04)      | -0.96 | 1.81 | 2.70 | 4.19 | 5.33  | 96.1    |
|         |                      | Twin   | None     |                 |              |                 | -2.64 | 2.91 | 4.18 | 2.02 | 2.32  | 97.8    |
|         |                      |        | Separate |                 |              | 68.6(2.78)      | -0.33 | 0.97 | 1.36 | 6.03 | 6.93  | 97.8    |
|         |                      |        | Combined | 69.1(2.76)      | 65.2(2.74)   | 69.0(2.78)      | -0.13 | 0.94 | 1.38 | 6.28 | 7.22  | 97.8    |
|         |                      |        | Mistaken |                 |              | 67.9(2.78)      | -0.77 | 1.21 | 1.69 | 4.85 | 5.57  | 97.8    |

Herbage availability (Low target range herbage: 900–1100 kg DM/ha, High:  $\geq 1400$  kg DM/ha). Interpretation of measures: The best model has the highest  $r^2$ , RPD, and RPIQ, and the lowest RMSE. Ranges for values:  $r^2$  (0: indicates that the model explains none of the variability of the response data around its mean, 1.0 indicates that the model explains all the variability). RPD (< 1.4: weak, 1.4 < RPD < 2.0: reasonable, > 2.0: excellent). RPIQ (< 1.4: very poor, 1.4 < RPIQ < 1.7: fair, 1.7 < RPIQ < 2.0: good, 2.0 < RPIQ < 2.5: very good, > 2.5: excellent).

**Table S9.** Measures of goodness of fit and accuracy (Bias, RMSE, RPE, RPD, RPIQ,  $r^2$ , CCC) of liveweight (without delay) prediction models (None: no model applied, separate: a separate/specific model applied, combined: pooled model where results were not significantly different and mistaken: model not developed for that availability level was applied) of ewes offered the Low, and High herbage levels by pregnancy-rank (PR: single, twin-bearing) at 130 days of pregnancy and during six hours of fasting tested on independent datasets (validation dataset) from Keeble farm, Tuapaka farm and Riverside farm collected in 2020. Liveweight means with their standard errors (kg).

| Farm     | Herbage availability | PR         | Model    | Liveweight (kg) |              |                 | Bias       | RMSE       | RPE % | RPD   | RPIQ  | r <sup>2</sup> % |      |
|----------|----------------------|------------|----------|-----------------|--------------|-----------------|------------|------------|-------|-------|-------|------------------|------|
|          |                      |            |          | Actual Initial  | Actual Final | Predicted Final |            |            |       |       |       |                  |      |
| Keeble   | Low                  | Single     | None     | 69.8(0.93)      | 68.0(0.91)   |                 | -1.29      | 1.57       | 2.24  | 4.18  | 6.07  | 98.6             |      |
|          |                      |            | Separate |                 |              | 70.5(0.91)      | 0.36       | 0.89       | 1.27  | 7.37  | 10.69 | 95.0             |      |
|          |                      |            | Combined |                 |              | 70.5(0.91)      | 0.41       | 0.91       | 1.31  | 7.17  | 10.40 | 98.6             |      |
|          |                      |            | Mistaken |                 |              | 71.1(0.91)      | 0.74       | 1.14       | 1.64  | 5.74  | 8.33  | 98.6             |      |
|          |                      | Twin       | None     | 75.8(1.11)      | 74.1(1.1)    |                 | -1.34      | 1.66       | 2.19  | 4.74  | 8.06  | 98.6             |      |
|          |                      |            | Separate |                 |              | 76.7(1.1)       | 0.42       | 1.05       | 1.38  | 7.51  | 12.76 | 82.6             |      |
|          |                      |            | Combined |                 |              | 76.6(1.1)       | 0.36       | 1.02       | 1.35  | 7.70  | 13.08 | 98.6             |      |
|          |                      |            | Mistaken |                 |              | 77.2(1.1)       | 0.69       | 1.22       | 1.61  | 6.45  | 10.97 | 98.6             |      |
|          |                      |            | Keeble   | High            | Single       | None            | 72.2(1.36) | 68.8(1.25) |       | -1.88 | 2.09  | 2.90             | 3.24 |
| Separate |                      |            |          |                 |              | 72.0(1.25)      | 0.25       | 0.83       | 1.15  | 8.14  | 11.73 | 98.8             |      |
| Combined |                      |            |          |                 |              | 72.0(1.25)      | 0.26       | 0.84       | 1.16  | 8.11  | 11.66 | 98.8             |      |
| Mistaken |                      |            |          |                 |              | 71.4(1.25)      | -0.09      | 0.78       | 1.08  | 8.72  | 12.55 | 98.8             |      |
| Twin     | None                 | 77.7(1.02) |          |                 | 75.4(1.02)   |                 | -1.96      | 2.27       | 2.92  | 3.15  | 4.82  | 97.7             |      |
|          | Separate             |            |          |                 |              | 77.0(1.86)      | 0.26       | 1.13       | 1.46  | 6.30  | 9.66  | 83.9             |      |
|          | Combined             |            |          |                 |              | 78.5(1.01)      | 0.21       | 1.12       | 1.44  | 6.38  | 9.79  | 97.8             |      |
|          | Mistaken             |            |          |                 |              | 77.9(1.01)      | -0.15      | 1.08       | 1.39  | 6.60  | 10.13 | 97.8             |      |
|          | Tuapaka              | Low        |          |                 | Single       | None            | 70.0(1.02) | 67.2(1.00) |       | -1.77 | 2.09  | 2.98             | 3.48 |
| Separate |                      |            |          |                 |              | 69.7(1.00)      | -0.05      | 0.92       | 1.31  | 7.89  | 6.47  | 98.4             |      |
| Combined |                      |            |          |                 |              | 69.8(1.00)      | 0.03       | 0.92       | 1.00  | 1.31  | 7.92  | 98.4             |      |
| Mistaken |                      |            |          |                 |              | 70.3(1.03)      | 0.35       | 0.97       | 1.13  | 1.39  | 7.44  | 98.4             |      |
| Twin     |                      |            | None     | 75.5(0.83)      | 72.7(0.81)   |                 | -2.14      | 2.12       | 2.81  | 2.77  | 3.23  | 97.8             |      |
|          |                      |            | Separate |                 |              | 75.3(0.81)      | -0.32      | 0.88       | 1.16  | 6.71  | 7.82  | 79.7             |      |
|          |                      |            | Combined |                 |              | 75.2(0.82)      | -0.38      | 0.88       | 0.90  | 1.17  | 6.65  | 79.7             |      |
|          |                      |            | Mistaken |                 |              | 75.9(0.82)      | -0.03      | 0.90       | 0.94  | 1.20  | 6.51  | 79.6             |      |
|          |                      |            | Tuapaka  | High            | Single       | None            | 73.2(0.96) | 69.5(0.94) |       | -2.53 | 2.79  | 3.82             | 2.39 |
| Separate |                      |            |          |                 |              | 72.7(0.93)      | -0.43      | 1.07       | 1.46  | 6.25  | 8.17  | 97.8             |      |
| Combined |                      |            |          |                 |              | 72.7(0.94)      | -0.42      | 1.07       | 1.06  | 1.46  | 6.27  | 97.8             |      |
| Mistaken |                      |            |          |                 |              | 72.1(0.94)      | -0.77      | 1.26       | 1.31  | 1.72  | 5.30  | 97.8             |      |
| Twin     | None                 | 76.7(0.87) |          |                 | 73.3(0.82)   |                 | -2.58      | 2.53       | 3.30  | 2.37  | 2.63  | 97.4             |      |
|          | Separate             |            |          |                 |              | 76.5(0.83)      | -0.44      | 0.99       | 1.29  | 6.05  | 6.71  | 78.7             |      |
|          | Combined             |            |          |                 |              | 76.4(0.83)      | -0.49      | 1.00       | 0.94  | 1.31  | 5.99  | 78.9             |      |
|          | Mistaken             |            |          |                 |              | 75.9(0.84)      | -0.83      | 1.04       | 1.09  | 1.36  | 5.76  | 78.7             |      |
|          | Riverside            | Low        |          |                 | Single       | None            | 69.1(0.89) | 66.7(0.84) |       | -1.69 | 1.90  | 2.47             | 2.75 |
| Separate |                      |            |          |                 |              | 69.1(0.84)      | -0.06      | 0.65       | 0.69  | 0.94  | 9.86  | 99.2             |      |
| Combined |                      |            |          |                 |              | 69.2(0.84)      | -0.01      | 0.65       | 0.68  | 0.94  | 9.86  | 99.2             |      |
| Mistaken |                      |            |          |                 |              | 69.7(0.84)      | 0.32       | 0.74       | 0.80  | 1.07  | 8.66  | 99.2             |      |
| Twin     |                      |            | None     | 74.7(0.87)      | 72.4(0.85)   |                 | -1.61      | 1.79       | 2.16  | 2.40  | 3.31  | 99.2             |      |
|          |                      |            | Separate |                 |              | 75.0(0.85)      | 0.13       | 0.57       | 0.60  | 0.76  | 10.4  | 99.2             |      |
|          |                      |            | Combined |                 |              | 74.9(0.85)      | 0.08       | 0.56       | 0.59  | 0.75  | 10.59 | 99.2             |      |
|          |                      |            | Mistaken |                 |              | 75.5(0.85)      | 0.41       | 0.71       | 0.76  | 0.95  | 8.35  | 99.2             |      |
|          |                      |            | High     | Single          | None         | 73.2(0.88)      | 70.3(0.87) |            | -1.85 | 2.10  | 2.54  | 2.87             | 3.01 |
| Separate |                      |            |          |                 |              |                 | 73.3(0.87) | 0.21       | 0.65  | 0.70  | 0.89  | 9.72             | 99.0 |
| Combined |                      |            |          |                 |              |                 | 73.4(0.87) | 0.22       | 0.66  | 0.71  | 0.90  | 9.58             | 99.0 |
| Mistaken |                      |            |          |                 |              |                 | 72.8(0.87) | -0.12      | 0.65  | 0.67  | 0.89  | 9.72             | 99.0 |
| Twin     |                      |            |          | None            | 78.1(1.14)   | 75.4(1.12)      |            | -1.69      | 1.93  | 2.18  | 2.47  | 4.28             | 99.5 |
|          |                      |            |          | Separate        |              |                 | 78.5(1.13) | 0.42       | 0.72  | 0.78  | 0.92  | 11.49            | 99.5 |
|          |                      |            | Combined |                 |              | 78.4(1.13)      | 0.37       | 0.69       | 0.75  | 0.88  | 11.99 | 99.5             |      |
|          | Mistaken             |            |          | 77.9(1.13)      | 0.03         | 0.60            | 0.61       | 0.77       | 13.78 | 99.5  |       |                  |      |

Availability level (Low target range herbage availability: 900–1100 kg DM/ha, High:  $\geq 1400$  kg DM/ha). Interpretation of measures: The best model has the highest  $r^2$ , RPD, and RPIQ, and the lowest RMSE. Ranges for values:  $r^2$  (0: indicates that the model accounts for none of the variability of the response data around its mean, 1.0 indicates that the model accounts for all the variability). RPD ( $< 1.4$ : weak,  $1.4 < \text{RPD} < 2.0$ : reasonable,  $> 2.0$ : excellent). RPIQ ( $< 1.4$ : very poor,  $1.4 < \text{RPIQ} < 1.7$ : fair,  $1.7 < \text{RPIQ} < 2.0$ : good,  $2.0 < \text{RPIQ} < 2.5$ : very good,  $> 2.5$ : excellent).
